# Supplementary material
Source: PubMed Central journal article supplement (PMC3202967)
Supplement: NIHMS328337-supplement-1.pdf [file NIHMS328337-supplement-1.pdf]

## SUPPLEMENT MATERIAL

### METHODS

#### Echocardiography and Hemodynamics Methods

Echocardiography (Vevo-770, Visualsonics Inc.) and invasive aortic micromanometry (SPR-671; Millar Instruments, Inc.) were performed at baseline to ensure there were no significant strain-related differences in hemodynamics and left ventricular function under anesthesia (n=8 for each group). A calibrated 1.4 French catheter-tip micromanometer (SPR-671; Millar Instruments, Inc.) was inserted into the carotid artery and advanced retrograde into the aorta. Pressure tracings were recorded at a sampling rate of 4,000 Hz (PowerLab 8SP; ADInstruments) to measure systolic and diastolic blood pressure (SBP, DBP). Echocardiography was performed in the parasternal long-axis and mid-ventricular short-axis planes using fundamental imaging at 40 MHz. Image sets were obtained by ECG gating of sequential M-mode lines for a post-acquisition 2-D frame rate of 1,000-1,100 Hz. Peak systolic (S') and early diastolic (E') radial velocities in the short-axis were measured by tissue Doppler imaging with a sample volume placed in the posterior endocardium. Velocity of circumferential fiber shortening (VcF) was measured by dividing fractional shortening by the ejection time.

#### Myocardial Blood Volume

For a blood pool agent, relative myocardial blood volume can be calculated by the ratio of signal intensity in the myocardium (A-value) during steady state to that in the blood pool ( $I_B$ ), or  $A/I_B$ . To convert myocardial mass to volume, it is necessary to divide by the myocardial mass  $1.06 \text{ g/cm}^3$ , or  $A/(1.06 \times I_B)$ . Since the ( $I_B$ ) value was obtained from the LV cavity using a 10-fold lower infusion rate to avoid dynamic range saturation, and the sternum produces a 91%

reduction (or 1/1.1) in contrast signal intensity compared to limb skeletal muscle, MBV was calculated as  $A/(1.06 \times I_B \times 10 \times 1.1)$ .

## SUPPLEMENT TABLES

**Table I. Hemodynamic and Echocardiographic Data**

|                                  | Wild-type<br>(n=8) | db/db<br>(n=8) |
|----------------------------------|--------------------|----------------|
| Heart Rate ( $\text{min}^{-1}$ ) | 481±59             | 465±70         |
| Systolic BP (mm Hg)              | 98±5               | 91±12          |
| Thickening Fraction              | 0.50±0.11          | 0.48±0.15      |
| Vcf (mm/s)                       | 0.70±0.13          | 0.70±0.17      |
| S' (mm Hg/s)                     | 16.7±4.7           | 15.2±4.7       |
| E' (mm/s)                        | 13.5±4.8           | 13.6±3.9       |

Vcf, velocity of circumferential fiber shortening; S' and E', peak early systolic and diastolic endocardial velocity.

**Table II. Parametric Contrast-enhanced Ultrasound Perfusion Imaging Data\***

|                                             | Wild-type |           |           |           | db/db      |           |           |            |
|---------------------------------------------|-----------|-----------|-----------|-----------|------------|-----------|-----------|------------|
|                                             | Baseline  | Day 1     | Day 3     | Day 21    | Baseline   | Day 1     | Day 3     | Day 21     |
| Microvascular blood volume (ml/g)           | 6.0±1.3   | 2.2±1.2   | 2.8±1.9   | 4.0±1.7   | 4.1±1.1†   | 1.9±1.6   | 1.5±0.7   | 1.4±0.8†   |
| Microvascular flux rate ( $\text{s}^{-1}$ ) | 0.25±0.02 | 0.06±0.03 | 0.11±0.06 | 0.14±0.06 | 0.16±0.04† | 0.07±0.06 | 0.06±0.02 | 0.08±0.04† |

\*p<0.05 for all post-ischemic values versus baseline values; † p<0.05 vs wild-type at the same time interval.

**On-line Supplement on Number of Animals for each observation (Figures 1 and 3).****Table III Figure Number of animals for each data point for Figure 1A**

|           | Baseline | Day 1 | Day 3 | Day 21 |
|-----------|----------|-------|-------|--------|
| Wild-type | 5        | 12    | 8     | 12     |
| db/db     | 8        | 12    | 8     | 8      |

**Table IV Number of animals for each data point for Figure 3A**

|               | Baseline | Day 1 | Day 3 |
|---------------|----------|-------|-------|
| Wild-type     | 5        | 8     | 8     |
| db/db         | 7        | 8     | 8     |
| db/db + MCP-1 | -        | 5     | 5     |
